# Supplementary material for: Study on the Environmental Impact and Benefits of Incorporating Humus Composites in Anaerobic Co-Digestion Treatment
Source: MDPI journal article supplement (doi:10.3390/toxics12050360), 2024-05-13
Supplement: s1 [file s1]

*Supplementary Data for*

**Study on the environmental impact and benefits of  
incorporating humus composites in anaerobic co-  
digestion treatment**

**Ke Zhao <sup>1</sup>, Qiang Wei <sup>1</sup>, Mingxuan Bai <sup>1</sup> and Mengnan Shen <sup>1</sup> \***

<sup>1</sup> Key Laboratory of Songliao Aquatic Environment, Ministry of Education, Jilin Jianzhu University, 5088 Xincheng Street, Changchun, 130118, China. Ke Zhao: zhaoke326@126.com; Qiang Wei: weiqiang@student.jlju.edu.cn; Mingxuan Bai: baimingxuan@student.jlju.edu.cn; Mengnan Shen: smn930@aliyun.com

\* Correspondence: smn930@aliyun.com; Tel.: 86-431-84566407

**TableS1.** Elemental content of humus composites.

| Parameters      | K     | Na    | Mg   | Al   | Fe   | Mn   | Zn   | Cu   |
|-----------------|-------|-------|------|------|------|------|------|------|
| Contents (mg/g) | 13.40 | 12.10 | 5.80 | 3.30 | 2.50 | 0.19 | 0.08 | 0.01 |

**TableS2.** Raw materials parameter.

| Parameters                             | KW            | SS           | Inoculum      | Mix substrate |
|----------------------------------------|---------------|--------------|---------------|---------------|
| pH                                     | 4.46 ± 0.05   | 6.69 ± 0.12  | 7.94 ± 0.04   | 7.04 ± 0.08   |
| TS (g/L)                               | 135 ± 3.28    | 33.96 ± 0.99 | 20.96 ± 0.31  | 29.75 ± 0.81  |
| VS (g/L)                               | 127.56 ± 3.24 | 20.55 ± 1.02 | 9.61 ± 1.28   | 18.01 ± 0.53  |
| VS/TS (%)                              | 97.75 ± 0.09  | 60.51 ± 1.22 | 45.85 ± 0.09  | 60.54 ± 0.14  |
| SCOD (g/L)                             | 103.99 ± 2.16 | 0.36 ± 0.02  | 0.52 ± 0.01   | 1.75 ± 0.02   |
| TCOD (g/L)                             | 324.75 ± 5.25 | 31.46 ± 0.89 | 14.53 ± 1.17  | 44.74 ± 2.15  |
| NH <sub>4</sub> <sup>+</sup> -N (mg/L) | 4.31 ± 0.04   | 10.11 ± 0.16 | 253.92 ± 2.35 | 214.01 ± 1.82 |

**TableS3.** Biogas production (ml/g-VS).

|    | Blank | HS 5g/L | HS 10g/L |
|----|-------|---------|----------|
| 1  | 0.00  | 1.39    | 0.00     |
| 3  | 11.10 | 24.71   | 3.89     |
| 5  | 26.37 | 44.14   | 8.19     |
| 7  | 38.45 | 58.03   | 17.21    |
| 10 | 50.11 | 71.63   | 20.41    |
| 15 | 73.71 | 96.34   | 39.56    |
| 20 | 77.60 | 113.55  | 48.72    |
| 25 | 77.60 | 116.88  | 53.72    |
| 30 | 77.60 | 116.88  | 53.72    |

**TableS4.** Table of emission factor coefficient during diesel fuel used.

| Pollutant type | Electric power | CO <sub>2</sub>    | NO <sub>x</sub>    | SO <sub>2</sub>    | CO                 |
|----------------|----------------|--------------------|--------------------|--------------------|--------------------|
| —              | 1.87<br>(kWh)  | 3.0959<br>(kg-/kg) | 2.0357<br>(kg-/kg) | 0.0863<br>(kg-/kg) | 1.1756<br>(kg-/kg) |

**TableS5.** Impact factor potential

| Pollutant type  | GWP   | Pollutant type  | AP   | Pollutant type               | EP   | Pollutant type  | HTP    |
|-----------------|-------|-----------------|------|------------------------------|------|-----------------|--------|
| CO <sub>2</sub> | 1.00  | SO <sub>2</sub> | 1.00 | NO <sub>3</sub> <sup>-</sup> | 1.00 | CO              | 1.00   |
| CO              | 2.00  | NO <sub>x</sub> | 0.70 | NO <sub>x</sub>              | 1.35 | NO <sub>x</sub> | 65.00  |
| CH <sub>4</sub> | 25.00 |                 |      |                              |      | SO <sub>2</sub> | 100.00 |

**TableS6.** Standardized factors for various types of environmental impacts.

| <b>Environmental impact type</b> | <b>normalized factor</b> |
|----------------------------------|--------------------------|
| GWP                              | 2.37E-14                 |
| AP                               | 4.18E-12                 |
| EP                               | 6.33E-12                 |
| HTP                              | 3.18E-13                 |
